# Supplementary material
Source: bioRxiv or medRxiv preprint supplement (https://medrxiv.org/content/medrxiv/early/2024/11/28/2024.11.25.24317908/DC1/embed/media-1.pdf)
Supplement: Supplementary file [file media-1.pdf]

# Supporting Information to

## Effects of spatial sampling on network alterations

### in idiopathic generalized epilepsy – can routine EEG be enough?

Christina Stier<sup>1, 2, 3</sup>, Markus Loose<sup>1</sup>, Carmen Loew<sup>1</sup>, Marysol Segovia Oropeza<sup>1</sup>,  
Sangyeob Baek<sup>4</sup>, Holger Lerche<sup>2</sup>, Niels K. Focke<sup>1, 2</sup>

<sup>1</sup>*Clinic of Neurology, University Medical Center Göttingen, Göttingen, Germany*

<sup>2</sup>*Department of Neurology and Epileptology, Hertie Institute for Clinical Brain Research, University of  
Tübingen, Tübingen, Germany*

<sup>3</sup>*Institute for Biomagnetism and Biosignal analysis, University of Münster, Münster, Germany*

<sup>4</sup>*MEG-Center, Hertie Institute for Clinical Brain Research, University of Tübingen, Tübingen, Germany*

**Table S1** Demographics and clinical information.

|                                   | Main study sample |           | Clinical routine sample |          |
|-----------------------------------|-------------------|-----------|-------------------------|----------|
|                                   | Patients          | Controls  | Patients                | Controls |
| Total (n)                         | 35                | 54        | 71                      | 43       |
| Site: total n Göttingen/Tübingen  | 10/25             | 15/39     | 71                      | 43       |
| Female, n (%)                     | 18 (72)           | 27 (49)   | 35 (49)                 | 26 (60)  |
| Mean age (y), (sd)                | 32 (11.6)         | 31 (12.2) | 29 (10.2)               | 28 (8.8) |
| GSWD during EEG recordings, n (%) | 13 (37)           | 0 (0)     | 19 (27) <sup>a</sup>    | 0 (0)    |
| Seizure free > 12 months, n (%)   | 19 (54)           | -         | 55 (77)                 | -        |
| Drug intake at measurement, n (%) | 2 (6)             | -         | 13 (10)                 | -        |
| Epilepsy syndrome, n (%)          |                   |           |                         |          |
| CAE                               | 5 (14)            | -         | 3 (4)                   | -        |
| JAE                               | 10 (29)           | -         | 7 (10)                  | -        |
| JME                               | 7 (20)            | -         | 23 (32)                 | -        |
| GTCS                              | 6 (17)            | -         | 19 (27)                 | -        |
| IGE                               | 7 (20)            | -         | 19 (27)                 | -        |

Abbreviations: CAE = childhood absence epilepsy; GSWD = generalized spike-wave discharges; GTCS = generalized tonic clonic seizures only; IGE = genetic generalized epilepsy (unclassified); IQR = interquartile range; JAE = juvenile absence epilepsy; JME = juvenile myoclonic epilepsy; sd = standard deviation; y = years. <sup>a</sup> Including eight patients who showed hyperventilation-induced GSWD.

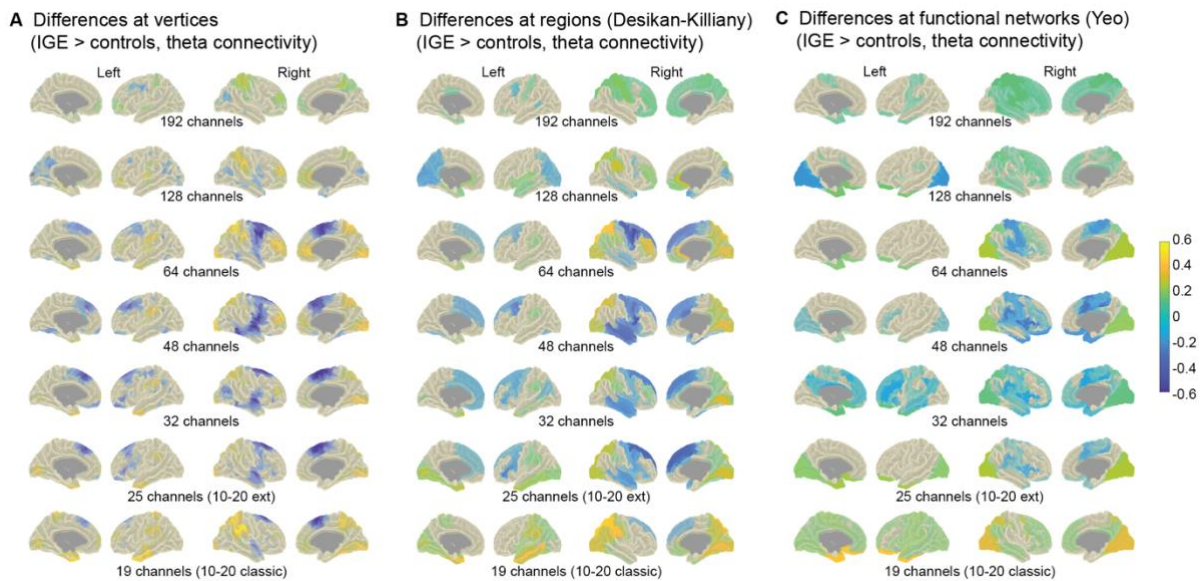

**Figure S1** Deviations from the original effect size maps (256 channels, individual head models) for connectivity at different channel sets and parcellations

Statistical group comparisons (IGE > controls) were performed separately for different parcellations of the brain (vertices, anatomical regions, and functional networks), including age, sex, and scanner site as covariates. Standardized effect sizes (Cohen *d*) were calculated based on the resulting *t*-values corrected for the influence of the covariates. For each resolution, the differences between the Cohen *d*-maps for the 256 channel-layout and those for the reduced layouts (19 to 192 channel densities) were then calculated and color-coded (**A-C**). Green and yellow colors indicate larger effect sizes and blue colors depict smaller effect sizes in the 256-reference map than in the respective lower sampling map. The results shown in (**A**) rely on EEG signals projected to 2004 vertices using individual head models and different channel compositions. For the anatomical (**B**) and network-based (**C**) analyses, individual connectivity values at the vertices were averaged for each region of interest (Desikan et al., 2006; Yeo et al., 2011).

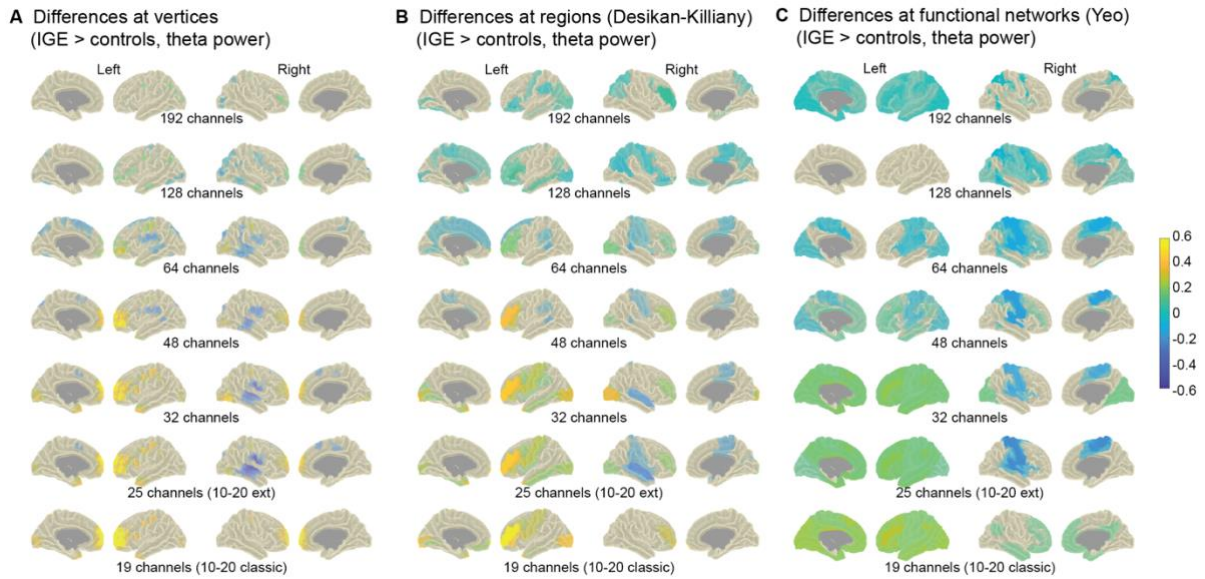

**Figure S2** Deviations from the original effect size maps (256 channels, individual head models) for power at different channel sets and parcellations

Statistical group comparisons (IGE > controls) were performed separately for different parcellations of the brain (vertices, anatomical regions, and functional networks), including age, sex, and scanner site as covariates. Standardized effect sizes (Cohen *d*) were calculated based on the resulting *t*-values corrected for the influence of the covariates. For each resolution, the differences between the Cohen *d*-maps for the 256 channel-layout and those for the reduced layouts (19 to 192 channel densities) were then calculated and color-coded (**A-C**). Green and yellow colors indicate larger effect sizes and blue colors depict smaller effect sizes in the 256-reference map than in the respective lower sampling map. The results shown in (**A**) rely on EEG signals projected to 2004 vertices using individual head models and different channel compositions. For the anatomical (**B**) and network-based (**C**) analyses, individual power values at the vertices were averaged for each region of interest (Desikan et al., 2006; Yeo et al., 2011).

## References

- Cohen, J. (1992). A power primer. *Psychological bulletin*, 112(1), 155.
- Desikan, R. S., Ségonne, F., Fischl, B., Quinn, B. T., Dickerson, B. C., Blacker, D., Buckner, R. L., Dale, A. M., Maguire, R. P., & Hyman, B. T. (2006). An automated labeling system for subdividing the human cerebral cortex on MRI scans into gyral based regions of interest. *Neuroimage*, 31(3), 968-980.
- Oostenveld, R., Fries, P., Maris, E., & Schoffelen, J.-M. (2011). FieldTrip: open source software for advanced analysis of MEG, EEG, and invasive electrophysiological data. *Computational intelligence and neuroscience*, 2011.
- Yeo, B. T., Krienen, F. M., Sepulcre, J., Sabuncu, M. R., Lashkari, D., Hollinshead, M., Roffman, J. L., Smoller, J. W., Zöllei, L., & Polimeni, J. R. (2011). The organization of the human cerebral cortex estimated by intrinsic functional connectivity. *Journal of neurophysiology*.
